# Supplementary material for: Unique combination of clinical features in a large cohort of 100 patients with retinitis pigmentosa caused by FAM161A mutations
Source: PubMed Central journal article supplement (PMC7495424; doi:10.1038/s41598-020-72028-0), 2020-09-16
Supplement: 41598_2020_72028_MOESM1_ESM.pdf [file 41598_2020_72028_MOESM1_ESM.pdf]

# **Unique Combination of Clinical Features in a Large Cohort of 100 Patients With Retinitis Pigmentosa Caused by *FAM161A* Mutations**

**Avigail Beryozkin<sup>1</sup>, Samer Khateb<sup>1</sup>, Carlos Alberto Idrobo-Robalino <sup>1</sup>, Muhammad Imran Khan<sup>2</sup>, Frans Cremers<sup>2,3</sup>, Alexey Obolensky<sup>1</sup>, Mor Hanany<sup>1</sup>, Eedy Mezer<sup>4</sup>, Itay Chowers<sup>1</sup>, Hadas Newman<sup>5,6</sup>, Tamar Ben-Yosef<sup>7</sup>, Dror Sharon<sup>1\*</sup>, and Eyal Banin<sup>1\*</sup>**

<sup>1</sup> Department of Ophthalmology, Hadassah-Hebrew University Medical Center, Jerusalem, Israel.

<sup>2</sup> Department of Human Genetics, Radboud University Medical Center, Nijmegen, The Netherlands.

<sup>3</sup> Donders Institute for Brain, Cognition and Behaviour, Radboud University, Nijmegen, The Netherlands.

<sup>4</sup> Alberto Moscona Department of Ophthalmology, Rambam Health Care Campus, Haifa, Israel.

<sup>5</sup> Sackler Faculty of Medicine, Tel-Aviv University, Tel-Aviv, Israel.

<sup>6</sup> Department of Ophthalmology, Tel-Aviv Sourasky Medical Center, Tel-Aviv, Israel.

<sup>7</sup> Rappaport Faculty of Medicine, Technion-Israel Institute of Technology, Haifa, Israel.

**Supplementary Figure 1:** Schematic representation of the *FAM161A*

pathogenic mutations that have been reported previously.

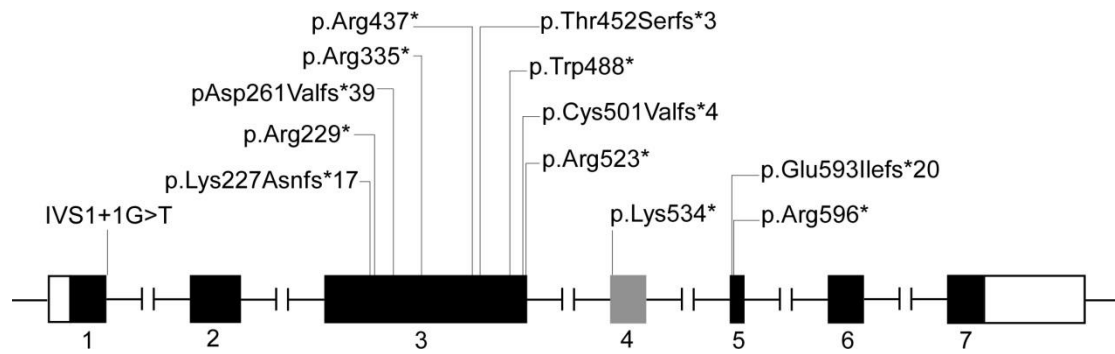

**Supplementary Table S1:** *FAM161A* mutations reported worldwide (based on NM\_001201543)

| #  | Mutation Name                                                    | Location | Number of patients                         | Reference |
|----|------------------------------------------------------------------|----------|--------------------------------------------|-----------|
| 1  | c.183+1G>T (IVS1+1G>T)                                           | Intron 1 | 1 compound heterozygous                    | 1         |
| 2  | c.678_681del, p.Lys227Asnfs*17                                   | Exon 3   | 1 homozygous                               | 2         |
| 3  | c.685C>T, p.Arg229*                                              | Exon 3   | 1 homozygous                               | 3         |
| 4  | c.728del, p.Asp261Valfs*39                                       | Exon 3   | 1 homozygous                               | 2         |
| 5  | c.1003C>T, p.Arg335*<br>(reported as c.1105C>T by <sup>4</sup> ) | Exon 3   | 2 homozygous                               | 5         |
|    |                                                                  |          | 3 homozygous                               | 4         |
| 6  | c.1309A>T, p.Arg437*                                             | Exon 3   | 3 homozygous                               | 3         |
|    |                                                                  |          | 5 homozygous +<br>3 compound heterozygous  | 1         |
|    |                                                                  |          | 6 homozygous                               | 6         |
|    |                                                                  |          | 1 homozygous +<br>1 compound heterozygous  | 7         |
|    |                                                                  |          | 1 compound heterozygous                    | 8         |
|    |                                                                  |          | 1 compound heterozygous                    | 9         |
| 7  | c.1355_1356del, p.Thr452Serfs*3                                  | Exon 3   | 26 homozygous +<br>5 compound heterozygous | 10        |
|    |                                                                  |          | 8 homozygous                               | 11        |
|    |                                                                  |          | 2 homozygous                               | 12        |
| 8  | c.1464G>A, p.Trp488*                                             | Exon 3   | 1 homozygous                               | 7         |
| 9  | c.1501del, p.Cys501Valfs*4                                       | Exon 3   | 1 compound heterozygous                    | 1         |
|    |                                                                  |          | 1 homozygous                               | 13        |
|    |                                                                  |          | 1 compound heterozygous                    | 8         |
|    |                                                                  |          | 1 homozygous                               | 9         |
| 10 | c.1567C>T, p.Arg523*                                             | Exon 3   | 9 homozygous<br>5 compound heterozygous    | 10        |
|    |                                                                  |          | 1 compound heterozygous                    | 1         |
|    |                                                                  |          | 1 compound heterozygous                    | 7         |
|    |                                                                  |          | 1 homozygous +<br>1 compound heterozygous  | 9         |
| 11 | c.1600A>T, p.Lys534*                                             | Exon 4   | 3 homozygous                               | 14        |

|    |                                                               |        |              |    |
|----|---------------------------------------------------------------|--------|--------------|----|
| 12 | c.1777_1778del, p.Glu593Ilefs*20<br>(reported as: p.R592FsX2) | Exon 5 | 5 homozygous | 15 |
| 13 | c.1786C>T, p.Arg596*                                          | Exon 5 | 2 homozygous | 10 |

### References:

- 1 Van Schil, K. *et al.* A Nonsense Mutation in FAM161A Is a Recurrent Founder Allele in Dutch and Belgian Individuals With Autosomal Recessive Retinitis Pigmentosa. *Invest Ophthalmol Vis Sci* **56**, 7418-7426, doi:10.1167/iovs.15-17920 (2015).
- 2 Carss, K. J. *et al.* Comprehensive Rare Variant Analysis via Whole-Genome Sequencing to Determine the Molecular Pathology of Inherited Retinal Disease. *American journal of human genetics* **100**, 75-90, doi:10.1016/j.ajhg.2016.12.003 (2017).
- 3 Langmann, T. *et al.* Nonsense mutations in FAM161A cause RP28-associated recessive retinitis pigmentosa. *Am J Hum Genet* **87**, 376-381 (2010).
- 4 Duncan, J. L. *et al.* Ocular Phenotype of a Family with FAM161A-associated Retinal Degeneration. *Ophthalmic genetics*, 1-9, doi:10.3109/13816810.2014.929716 (2015).
- 5 Zobor, D., Balousha, G., Baumann, B. & Wissinger, B. Homozygosity mapping reveals new nonsense mutation in the FAM161A gene causing autosomal recessive retinitis pigmentosa in a Palestinian family. *Molecular vision* **20**, 178-182 (2014).
- 6 Rose, A. M. *et al.* Diverse clinical phenotypes associated with a nonsense mutation in FAM161A. *Eye* **29**, 1226-1232, doi:10.1038/eye.2015.93 (2015).
- 7 Ellingford, J. M. *et al.* Molecular findings from 537 individuals with inherited retinal disease. *Journal of medical genetics* **53**, 761-767, doi:10.1136/jmedgenet-2016-103837 (2016).
- 8 Wang, J. *et al.* Dependable and efficient clinical utility of target capture-based deep sequencing in molecular diagnosis of retinitis pigmentosa. *Investigative ophthalmology & visual science* **55**, 6213-6223, doi:10.1167/iovs.14-14936 (2014).
- 9 Jespersgaard, C. *et al.* Molecular genetic analysis using targeted NGS analysis of 677 individuals with retinal dystrophy. *Scientific reports* **9**, 1219, doi:10.1038/s41598-018-38007-2 (2019).
- 10 Bandah-Rozenfeld, D. *et al.* Homozygosity mapping reveals null mutations in FAM161A as a cause of autosomal-recessive retinitis pigmentosa. *Am J Hum Genet* **87**, 382-391 (2010).
- 11 Venturini, G. *et al.* Molecular genetics of FAM161A in North American patients with early-onset retinitis pigmentosa. *PLoS One* **9**, e92479, doi:10.1371/journal.pone.0092479 (2014).
- 12 Beryozkin, A. *et al.* Whole Exome Sequencing Reveals Mutations in Known Retinal Disease Genes in 33 out of 68 Israeli Families with Inherited Retinopathies. *Scientific reports* **5**, 13187, doi:10.1038/srep13187 (2015).
- 13 Glockle, N. *et al.* Panel-based next generation sequencing as a reliable and efficient technique to detect mutations in unselected patients with retinal dystrophies. *European journal of human genetics : EJHG* **22**, 99-104, doi:10.1038/ejhg.2013.72 (2014).
- 14 Maranhao, B. *et al.* Investigating the Molecular Basis of Retinal Degeneration in a Familial Cohort of Pakistani Decent by Exome Sequencing. *PloS one* **10**, e0136561, doi:10.1371/journal.pone.0136561 (2015).

- 15 Zhou, Y. *et al.* Whole-exome sequencing reveals a novel frameshift mutation in the FAM161A gene causing autosomal recessive retinitis pigmentosa in the Indian population. *Journal of human genetics* **60**, 625-630, doi:10.1038/jhg.2015.92 (2015).

**Supplementary Table S2:** Clinical parameters of patients who participated in the study

| Patient number (age)        | Mutation 1      | Mutation 2      | Age of disease onset | Visual Acuity as Snellen ratio (age if differs from 1 <sup>st</sup> column) <sup>b</sup> | Refraction In diopters (age if differs from 1 <sup>st</sup> column) <sup>c</sup> | Cone flicker 30Hz (μV;msec) <sup>d</sup> | Mixed cone-rod response a wave: b wave (μV) <sup>d</sup> | Rod response (μV) <sup>d</sup> | ERM              | Cataract (age at surgery, if performed) |
|-----------------------------|-----------------|-----------------|----------------------|------------------------------------------------------------------------------------------|----------------------------------------------------------------------------------|------------------------------------------|----------------------------------------------------------|--------------------------------|------------------|-----------------------------------------|
| MOL0053-2 (30) <sup>a</sup> | p.Arg523*       | p.Arg523*       | 18                   | 0.4                                                                                      | -6.50                                                                            | ND                                       | ND                                                       | ND                             | Yes              | Yes                                     |
| MOL0053-3 (44)              | p.Arg523*       | p.Arg523*       | 4                    | 0.34                                                                                     | -7.00                                                                            | NA                                       | NA                                                       | NA                             | Yes              | Yes                                     |
| MOL0100-1 (10) <sup>a</sup> | p.Thr452Serfs*3 | p.Thr452Serfs*3 | 10                   | 1                                                                                        | -3.25                                                                            | ND                                       | ND                                                       | ND                             | Yes              | No                                      |
| MOL0100-2 (10) <sup>a</sup> | p.Thr452Serfs*3 | p.Thr452Serfs*3 | 10                   | 0.9                                                                                      | -6.00                                                                            | ND                                       | SR                                                       | ND                             | Yes              | No                                      |
| MOL0139-1 (10) <sup>a</sup> | p.Thr452Serfs*3 | p.Thr452Serfs*3 | Childhood            | 0.83                                                                                     | NA                                                                               | 33;39                                    | 80:258                                                   | 216                            | Yes              | No                                      |
| MOL0139-2 (43) <sup>a</sup> | p.Thr452Serfs*3 | p.Thr452Serfs*3 | NA                   | 0.12                                                                                     | NA                                                                               | SR                                       | SR                                                       | SR                             | NA               | NA                                      |
| MOL0195-1 (29) <sup>a</sup> | p.Thr452Serfs*3 | p.Arg523*       | Teen years           | 1.25                                                                                     | -6.00                                                                            | ND                                       | ND                                                       | ND                             | Yes <sup>e</sup> | Yes (37)                                |
| MOL0228-1 (11)              | p.Thr452Serfs*3 | p.Thr452Serfs*3 | 11                   | 0.63                                                                                     | High myopia                                                                      | ND                                       | ND                                                       | ND                             | NA               | Yes                                     |
| MOL0228-2 (27)              | p.Thr452Serfs*3 | p.Thr452Serfs*3 | Teen years           | 0.45                                                                                     | -3.00                                                                            | ND                                       | ND                                                       | ND                             | NA               | Yes (33)                                |
| MOL0228-3 (10)              | p.Thr452Serfs*3 | p.Thr452Serfs*3 | 10                   | 0.5                                                                                      | -3.25                                                                            | 26;32                                    | 55:110                                                   | ND                             | Yes              | Yes                                     |
| MOL0276-1 (41) <sup>a</sup> | p.Arg523*       | p.Arg523*       | NA                   | 0.9                                                                                      | NA                                                                               | 27;31                                    | 95:154                                                   | 109                            | Yes              | NA                                      |
| MOL0276-2 (51) <sup>a</sup> | p.Arg523*       | p.Arg523*       | NA                   | 0.05                                                                                     | -4.75                                                                            | ND                                       | ND                                                       | ND                             | Yes              | Yes                                     |
| MOL0284-1 (38) <sup>a</sup> | p.Thr452Serfs*3 | p.Thr452Serfs*3 | 2                    | 0.29                                                                                     | -12.00                                                                           | ND                                       | ND                                                       | ND                             | Yes              | Yes (50)                                |
| MOL0286-1 (59) <sup>a</sup> | p.Thr452Serfs*3 | p.Thr452Serfs*3 | 3                    | 1.0                                                                                      | -1.75                                                                            | 22;35                                    | 67:154                                                   | 65                             | Yes              | Yes                                     |
| MOL0303-1 (19) <sup>a</sup> | p.Thr452Serfs*3 | p.Arg523*       | 18                   | 1.0                                                                                      | NA                                                                               | ND                                       | ND                                                       | ND                             | NA               | Yes                                     |
| MOL0313-1 (35)              | p.Thr452Serfs*3 | p.Thr452Serfs*3 | 14                   | 0.14                                                                                     | -6.00                                                                            | ND                                       | ND                                                       | ND                             | Yes              | Yes                                     |
| MOL0352-1 (78)              | p.Thr452Serfs*3 | p.Thr452Serfs*3 | NA                   | NA                                                                                       | NA                                                                               | NA                                       | NA                                                       | NA                             | NA               | NA                                      |
| MOL0446-1 (28) <sup>a</sup> | p.Thr452Serfs*3 | p.Arg523*       | Childhood            | 0.65                                                                                     | -9.00                                                                            | ND                                       | ND                                                       | ND                             | Yes              | Yes                                     |
| MOL0453-1 (43)              | p.Thr452Serfs*3 | p.Thr452Serfs*3 | NA                   | 0.4                                                                                      | -3.75                                                                            | ND                                       | ND                                                       | ND                             | NA               | NA                                      |



|                |                 |                 |           |        |             |       |       |    |     |          |
|----------------|-----------------|-----------------|-----------|--------|-------------|-------|-------|----|-----|----------|
| MOL1073-1 (43) | p.Thr452Serfs*3 | p.Thr452Serfs*3 | 30        | 0.63   | -4.50       | NA    | NA    | NA | Yes | Yes (34) |
| MOL1073-2      | p.Thr452Serfs*3 | p.Thr452Serfs*3 | NA        | NA     | NA          | NA    | NA    | NA | NA  | NA       |
| MOL1073-3      | p.Thr452Serfs*3 | p.Thr452Serfs*3 | NA        | NA     | NA          | NA    | NA    | NA | NA  | NA       |
| MOL1160-1 (61) | p.Thr452Serfs*3 | p.Thr452Serfs*3 | 18        | 0.2    | -3.75       | ND    | ND    | ND | Yes | Yes (65) |
| MOL1200-1 (29) | p.Thr452Serfs*3 | p.Thr452Serfs*3 | 30        | 1.0    | NA          | ND    | ND    | ND | Yes | Yes      |
| MOL1209-1 (18) | p.Thr452Serfs*3 | p.Thr452Serfs*3 | 10        | 0.8    | NA          | 10:26 | 3:36  | ND | Yes | No       |
| MOL1221-1      | p.Arg523*       | p.Arg523*       | NA        | NA     | NA          | NA    | NA    | NA | NA  | NA       |
| MOL1289-1 (9)  | p.Thr452Serfs*3 | p.Thr452Serfs*3 | 9         | 0.5    | -9.75       | ND    | ND    | ND | Yes | NA       |
| MOL1294-1 (31) | p.Thr452Serfs*3 | p.Thr452Serfs*3 | NA        | 1.0    | NA          | NA    | NA    | NA | NA  | NA       |
| MOL1300-1 (9)  | p.Arg523*       | p.Arg523*       | Childhood | 0.45   | -1.50       | ND    | ND    | ND | NA  | NA       |
| MOL1300-2 (19) | p.Arg523*       | p.Arg523*       | Childhood | 0.1    | -4.00       | ND    | ND    | ND | NA  | NA       |
| MOL1300-3 (9)  | p.Arg523*       | p.Arg523*       | Childhood | 0.43   | -1.25       | ND    | ND    | ND | NA  | NA       |
| MOL1335-1      | p.Thr452Serfs*3 | p.Thr452Serfs*3 | NA        | NA     | High myopia | NA    | NA    | NA | NA  | Yes      |
| MOL1335-2      | p.Thr452Serfs*3 | p.Thr452Serfs*3 | NA        | NA     | NA          | NA    | NA    | NA | NA  | NA       |
| MOL1350-1 (69) | p.Thr452Serfs*3 | p.Thr452Serfs*3 | NA        | 0.0001 | NA          | ND    | ND    | ND | Yes | NA       |
| MOL1365-1 (82) | p.Thr452Serfs*3 | p.Thr452Serfs*3 | NA        | NA     | NA          | NA    | NA    | NA | NA  | NA       |
| MOL1380-1 (47) | p.Thr452Serfs*3 | p.Thr452Serfs*3 | Childhood | 0.33   | -4.00       | ND    | ND    | ND | Yes | Yes (63) |
| MOL1387-1 (17) | p.Thr452Serfs*3 | p.Thr452Serfs*3 | Childhood | 0.65   | NA          | 9:40  | 38:58 | ND | Yes | NA       |
| MOL1392-1 (43) | p.Thr452Serfs*3 | p.Thr452Serfs*3 | NA        | 0.8    | NA          | 13:36 | ND    | ND | Yes | Yes      |
| MOL1426-1 (40) | p.Thr452Serfs*3 | p.Arg523*       | 18        | 0.3    | -3.50       | 21:31 | 27:41 | ND | Yes | Yes      |
| MOL1504-1 (20) | p.Thr452Serfs*3 | p.Thr452Serfs*3 | 6         | 1      | -4.75       | 10:43 | 29:77 | 64 | Yes | NA       |
| MOL1545-1 (19) | p.Arg523*       | p.Arg523*       | Childhood | 0.45   | -5.75       | ND    | ND    | ND | No  | No       |
| MOL1545-2 (14) | p.Arg523*       | p.Arg523*       | Childhood | 0.44   | -7.75       | ND    | ND    | ND | No  | No       |
| MOL1545-4 (7)  | p.Arg523*       | p.Arg523*       | 5         | 0.5    | -6.75       | SR    | SR    | SR | No  | No       |
| MOL1649-1 (62) | p.Thr452Serfs*3 | p.Thr452Serfs*3 | 60        | 0.8    | -0.75       | 11:40 | ND    | ND | Yes | Yes      |
| MOL1666-1 (45) | p.Thr452Serfs*3 | p.Thr452Serfs*3 | NA        | NA     | NA          | ND    | ND    | ND | NA  | NA       |
| MOL1666-2 (38) | p.Thr452Serfs*3 | p.Thr452Serfs*3 | NA        | NA     | NA          | ND    | ND    | ND | NA  | NA       |
| MOL1668-1 (5)  | p.Thr452Serfs*3 | p.Arg523*       | NA        | NA     | NA          | 14:33 | ND    | ND | NA  | NA       |
| MOL1750-1 (15) | p.Thr452Serfs*3 | p.Thr452Serfs*3 | Childhood | 0.8    | -7.50       | ND    | ND    | ND | Yes | No       |
| MOL1765-1 (20) | p.Thr452Serfs*3 | p.Thr452Serfs*3 | 20        | 0.8    | NA          | 27:44 | ND    | ND | Yes | No       |
| MOL1773-1 (39) | p.Thr452Serfs*3 | p.Arg523*       | Childhood | 0.8    | NA          | ND    | ND    | ND | Yes | Yes      |
| MOL1779-1 (18) | p.Thr452Serfs*3 | p.Thr452Serfs*3 | NA        | 0.8    | NA          | ND    | ND    | ND | NA  | NA       |
| MOL1793-1 (62) | p.Thr452Serfs*3 | p.Thr452Serfs*3 | 7         | 0.06   | -8.00       | ND    | ND    | ND | Yes | Yes      |
| MOL1831-1 (86) | p.Thr452Serfs*3 | p.Thr452Serfs*3 | NA        | 0.0001 | High myopia | ND    | ND    | ND | Yes | Yes      |



|                            |                 |                 |           |        |        |       |        |    |                  |          |
|----------------------------|-----------------|-----------------|-----------|--------|--------|-------|--------|----|------------------|----------|
| MOL1833-1 (30)             | p.Thr452Serfs*3 | p.Arg523*       | 10        | 0.45   | -8.00  | ND    | ND     | ND | NA               | NA       |
| TB21-R28 (24) <sup>a</sup> | p.Thr452Serfs*3 | p.Thr452Serfs*3 | 12        | 0.001  | NA     | 30;28 | ND     | ND | Yes              | Yes      |
| TB21-R27 (34)              | p.Thr452Serfs*3 | p.Thr452Serfs*3 | 34        | 0.31   | -9.65  | ND    | ND     | ND | NA               | Yes      |
| TB21-R29                   | p.Thr452Serfs*3 | p.Thr452Serfs*3 | NA        | NA     | NA     | NA    | NA     | NA | NA               | NA       |
| TB21-R20 (63) <sup>a</sup> | p.Thr452Serfs*3 | p.Thr452Serfs*3 | 50        | 0.3    | NA     | ND    | ND     | ND | Yes <sup>e</sup> | Yes      |
| TB65-U52 (27)              | p.Thr452Serfs*3 | p.Thr452Serfs*3 | Childhood | 0.8    | NA     | ND    | ND     | ND | Yes              | Yes      |
| TB65-U61                   | p.Thr452Serfs*3 | p.Thr452Serfs*3 | NA        | NA     | NA     | NA    | NA     | NA | NA               | NA       |
| TB112-835522 (64)          | p.Thr452Serfs*3 | p.Thr452Serfs*3 | 40        | 0.001  | -4.50  | ND    | ND     | ND | Yes              | Yes (68) |
| TB155-R417 (52)            | p.Thr452Serfs*3 | p.Thr452Serfs*3 | 20        | 0.05   | NA     | 9;39  | 22:16  | ND | Yes              | Yes      |
| TB190-R476 (52)            | p.Thr452Serfs*3 | p.Thr452Serfs*3 | 45        | 0.28   | NA     | SR    | SR     | SR | Yes <sup>e</sup> | Yes      |
| TB190-R477 (24)            | p.Thr452Serfs*3 | p.Thr452Serfs*3 | 20        | NA     | NA     | ND    | ND     | ND | Yes              | No       |
| TB195-R492 (65)            | p.Thr452Serfs*3 | p.Thr452Serfs*3 | 17        | NA     | NA     | NA    | NA     | NA | NA               | NA       |
| TB205-R515 (56)            | p.Thr452Serfs*3 | p.Thr452Serfs*3 | 40        | NA     | NA     | NA    | NA     | NA | NA               | NA       |
| TB250-R582 (33)            | p.Thr452Serfs*3 | p.Arg523*       | 20        | 0.58   | -8.00  | ND    | ND     | ND | Yes              | No       |
| TB332-R710 (39)            | p.Thr452Serfs*3 | p.Thr452Serfs*3 | 29        | NA     | NA     | ND    | ND     | ND | NA               | NA       |
| TB346-R732 (51)            | p.Thr452Serfs*3 | p.Thr452Serfs*3 | Childhood | NA     | NA     | NA    | NA     | NA | NA               | NA       |
| TB370-R760 (44)            | p.Thr452Serfs*3 | p.Thr452Serfs*3 | 24        | 0.6    | -6.00  | 9;41  | 44:117 | 16 | Yes              | Yes      |
| TB379-R777 (58)            | p.Thr452Serfs*3 | p.Thr452Serfs*3 | Childhood | 0.0001 | NA     | ND    | ND     | ND | Yes              | Yes (57) |
| TB490-R940 (56)            | p.Thr452Serfs*3 | p.Thr452Serfs*3 | NA        | NA     | NA     | 51;38 | 81:90  | ND | Yes              | NA       |
| TB525-R994 (17)            | p.Thr452Serfs*3 | p.Arg523*       | 8         | 0.4    | -15.00 | ND    | ND     | ND | No               | No       |
| TB525-R995 (21)            | p.Thr452Serfs*3 | p.Arg523*       | 14        | 0.7    | -10.00 | ND    | ND     | ND | No               | Yes      |
| TB539-R1015 (69)           | p.Thr452Serfs*3 | p.Thr452Serfs*3 | 20        | 0.35   | -3.00  | ND    | ND     | ND | Yes              | Yes      |
| TB712-R1292 (31)           | p.Thr452Serfs*3 | p.Thr452Serfs*3 | 7         | 0.66   | -5.25  | 11;37 | SR     | ND | Yes              | No       |
| TB790-R1390 (32)           | p.Thr452Serfs*3 | p.Thr452Serfs*3 | 32        | 0.75   | -2.75  | ND    | ND     | ND | Yes              | No       |
| TB836-R1466 (4)            | p.Thr452Serfs*3 | p.Thr452Serfs*3 | 4         | 0.01   | NA     | ND    | ND     | ND | No               | No       |
| TB840-R1474 (36)           | p.Thr452Serfs*3 | p.Thr452Serfs*3 | 10        | 0.5    | -10.00 | ND    | ND     | ND | Yes              | Yes (45) |

ND - non-detectable, SR- severely reduced, NA- not available

a - Clinical data regarding these patients were previously published<sup>9</sup>

b - Best corrected visual acuity is presented as an average of the two eyes, in decimal values. In order to provide numerical values for low VA, the following conversions were made: NLP (no light perception) = 0; LP (light perception) = 0.0001; HM (hand movement) = 0.001; FC (finger counting) = 0.01.

c - Refraction is presented as average spherical equivalent of both eyes, in diopters

d - Full field ERG testing performed according to ISCEV standard; average of the values recorded in the two eyes are shown for each of the main stimulus conditions. Limits of normal are as follows: 30Hz Cone Flicker: lower threshold of normal for amplitude-60 $\mu$ V; upper limit for implicit time- 33msec; Mixed cone-rod response- lower threshold of normal for b wave amplitude- 400 $\mu$ V; for a-wave- 100 $\mu$ V; Rod response- lower threshold of normal for amplitude- 200 $\mu$ V.

e - Macular edema

**Supplementary Table S3:** Statistical analysis of BCVA in patients with *FAM161A* genotypes

| <b>A. Analysis of Covariance including all 3 <i>FAM161A</i> genotypes. Tests of Between-Subjects Effects</b>                            |                         |     |             |         |                   |  |
|-----------------------------------------------------------------------------------------------------------------------------------------|-------------------------|-----|-------------|---------|-------------------|--|
| Dependent Variable:                                                                                                                     | Average VA Snellen      |     |             |         |                   |  |
| Source                                                                                                                                  | Type III Sum of Squares | df  | Mean Square | F       | Sig.              |  |
| Corrected Model                                                                                                                         | 14.659 <sup>a</sup>     | 5   | 2.932       | 42.181  | 0.000             |  |
| Intercept                                                                                                                               | 20.045                  | 1   | 20.045      | 288.402 | 0.000             |  |
| Genotype                                                                                                                                | 2.303                   | 2   | 1.151       | 16.565  | <b>p&lt;0.001</b> |  |
| AGE (years)                                                                                                                             | 7.013                   | 1   | 7.013       | 100.902 | <b>p&lt;0.001</b> |  |
| Genotype * AGE (years)                                                                                                                  | 1.700                   | 2   | 0.850       | 12.228  | <b>p&lt;0.001</b> |  |
| Error                                                                                                                                   | 25.021                  | 360 | 0.070       |         |                   |  |
| Total                                                                                                                                   | 122.967                 | 366 |             |         |                   |  |
| Corrected Total                                                                                                                         | 39.680                  | 365 |             |         |                   |  |
| <b>a. R Squared = .369 (Adjusted R Squared = .361)</b>                                                                                  |                         |     |             |         |                   |  |
|                                                                                                                                         |                         |     |             |         |                   |  |
| <b>B. Analysis of Covariance, comparing homozygotes for Frameshift versus Compound heterozygotes: Tests of Between-Subjects Effects</b> |                         |     |             |         |                   |  |
| Dependent Variable:                                                                                                                     | Average VA Snellen      |     |             |         |                   |  |
| Source                                                                                                                                  | Type III Sum of Squares | df  | Mean Square | F       | Sig.              |  |

|                        |                     |     |        |         |         |  |
|------------------------|---------------------|-----|--------|---------|---------|--|
| Corrected Model        | 10.509 <sup>a</sup> | 3   | 3.503  | 46.114  | 0.000   |  |
| Intercept              | 18.794              | 1   | 18.794 | 247.417 | 0.000   |  |
| Genotype               | 1.336               | 1   | 1.336  | 17.593  | p<0.001 |  |
| AGE (years)            | 7.209               | 1   | 7.209  | 94.903  | p<0.001 |  |
| Genotype * AGE (years) | 1.660               | 1   | 1.660  | 21.853  | p<0.001 |  |
| Error                  | 22.940              | 302 | 0.076  |         |         |  |
| Total                  | 116.164             | 306 |        |         |         |  |
| Corrected Total        | 33.449              | 305 |        |         |         |  |

a. R Squared = .314 (Adjusted R Squared = .307)

### C. Analysis of Covariance, comparing homozygotes Frameshift versus homozygotes Nonsense: Tests of Between-Subjects Effects

| Dependent Variable:    | Average VA Snellen      |    |             |         |         |  |
|------------------------|-------------------------|----|-------------|---------|---------|--|
| Source                 | Type III Sum of Squares | df | Mean Square | F       | Sig.    |  |
| Corrected Model        | 10.216 <sup>a</sup>     | 3  | 3.405       | 52.424  | 0.000   |  |
| Intercept              | 13.647                  | 1  | 13.647      | 210.102 | 0.000   |  |
| Genotype               | 0.735                   | 1  | 0.735       | 11.313  | 0.001   |  |
| AGE (years)            | 2.706                   | 1  | 2.706       | 41.653  | p<0.001 |  |
| Genotype * AGE (years) | 0.004                   | 1  | 0.004       | 0.061   | 0.805   |  |

|                 |         |     |       |  |  |  |
|-----------------|---------|-----|-------|--|--|--|
| Error           | 19.876  | 306 | 0.065 |  |  |  |
| Total           | 102.982 | 310 |       |  |  |  |
| Corrected Total | 30.092  | 309 |       |  |  |  |

a. R Squared = .339 (Adjusted R Squared = .333)

**D. Analysis of Covariance, comparing Compound heterozygotes versus homozygotes Nonsense: Tests of Between-Subjects Effects**

|                        |                                |           |                    |          |                   |  |
|------------------------|--------------------------------|-----------|--------------------|----------|-------------------|--|
| Dependent Variable:    | <b>Average VA Snellen</b>      |           |                    |          |                   |  |
| <b>Source</b>          | <b>Type III Sum of Squares</b> | <b>df</b> | <b>Mean Square</b> | <b>F</b> | <b>Sig.</b>       |  |
| Corrected Model        | 5.924 <sup>a</sup>             | 3         | 1.975              | 30.606   | 0.000             |  |
| Intercept              | 10.400                         | 1         | 10.400             | 161.201  | 0.000             |  |
| Genotype               | 2.294                          | 1         | 2.294              | 35.555   | <b>p&lt;0.001</b> |  |
| AGE (years)            | 4.633                          | 1         | 4.633              | 71.809   | <b>p&lt;0.001</b> |  |
| Genotype * AGE (years) | 1.199                          | 1         | 1.199              | 18.590   | <b>p&lt;0.001</b> |  |
| Error                  | 7.226                          | 112       | 0.065              |          |                   |  |
| Total                  | 26.788                         | 116       |                    |          |                   |  |
| Corrected Total        | 13.149                         | 115       |                    |          |                   |  |

a. R Squared = .450 (Adjusted R Squared = .436)

| Generalized Linear Model with repeated measurements: Tests of Model Effects |                 |    |                   |  |  |  |
|-----------------------------------------------------------------------------|-----------------|----|-------------------|--|--|--|
| Source                                                                      | Type III        |    |                   |  |  |  |
|                                                                             | Wald Chi-Square | df | Sig.              |  |  |  |
| (Intercept)                                                                 | 73.401          | 1  | 0.000             |  |  |  |
| Genotype                                                                    | 15.578          | 2  | <b>p&lt;0.001</b> |  |  |  |
| AGE (years)                                                                 | 46.579          | 1  | <b>p&lt;0.001</b> |  |  |  |
| Mutation Type * AGE (years)                                                 | 8.638           | 2  | <b>0.013</b>      |  |  |  |
| Dependent Variable: Average VA Snellen                                      |                 |    |                   |  |  |  |
| Model: (Intercept), Mutation Type, AGE (years), Mutation Type * AGE (years) |                 |    |                   |  |  |  |

**Supplementary Table S4:** Statistical analysis of VF in patients with *FAM161A* mutations versus patients with mutations in other RP-causing genes.

| <b>A. Pearson Correlation:</b>              |                         |                         |                         |  |  |  |
|---------------------------------------------|-------------------------|-------------------------|-------------------------|--|--|--|
|                                             |                         | Visual Field Area (cm2) |                         |  |  |  |
| Age                                         | Pearson Correlation     | <b>-0.129</b>           |                         |  |  |  |
|                                             | Sig. (2-tailed)         | 0.185                   |                         |  |  |  |
|                                             | N                       | 108                     |                         |  |  |  |
| <b>Spearman's rho:</b>                      |                         |                         |                         |  |  |  |
|                                             |                         | Visual Field Area (cm2) |                         |  |  |  |
| Age                                         | Correlation Coefficient | <b>-0.088</b>           |                         |  |  |  |
|                                             | Sig. (2-tailed)         | 0.366                   |                         |  |  |  |
|                                             | N                       | 108                     |                         |  |  |  |
| <b>Pearson Correlation: Different genes</b> |                         |                         |                         |  |  |  |
| Gene name                                   |                         |                         | Visual Field Area (cm2) |  |  |  |
| MAK                                         | Age                     | Pearson Correlation     | <b>-.724**</b>          |  |  |  |
|                                             |                         | Sig. (2-tailed)         | 0.000                   |  |  |  |
|                                             |                         | N                       | 27                      |  |  |  |

|         |     |                     |               |  |  |  |
|---------|-----|---------------------|---------------|--|--|--|
| RPGR    | Age | Pearson Correlation | -.580*        |  |  |  |
|         |     | Sig. (2-tailed)     | 0.048         |  |  |  |
|         |     | N                   | 12            |  |  |  |
| DHDDS   | Age | Pearson Correlation | <b>-0.245</b> |  |  |  |
|         |     | Sig. (2-tailed)     | 0.442         |  |  |  |
|         |     | N                   | 12            |  |  |  |
| FAM161A | Age | Pearson Correlation | <b>0.194</b>  |  |  |  |
|         |     | Sig. (2-tailed)     | 0.149         |  |  |  |
|         |     | N                   | 57            |  |  |  |

\*\* . Correlation is significant at the 0.01 level (2-tailed).

\* . Correlation is significant at the 0.05 level (2-tailed).

### B. Spearman's rho: Different genes

| Gene name |     |                         | Visual Field Area (cm2) |  |  |  |
|-----------|-----|-------------------------|-------------------------|--|--|--|
| MAK       | Age | Correlation Coefficient | -.788**                 |  |  |  |
|           |     | Sig. (2-tailed)         | 0.000                   |  |  |  |
|           |     | N                       | 27                      |  |  |  |
| RPGR      | Age | Correlation Coefficient | <b>-0.453</b>           |  |  |  |



|         |     |                         |              |  |  |  |
|---------|-----|-------------------------|--------------|--|--|--|
|         |     | Sig. (2-tailed)         | 0.140        |  |  |  |
|         |     | N                       | 12           |  |  |  |
| DHDDS   | Age | Correlation Coefficient | <b>0.007</b> |  |  |  |
|         |     | Sig. (2-tailed)         | 0.983        |  |  |  |
|         |     | N                       | 12           |  |  |  |
| FAM161A | Age | Correlation Coefficient | <b>0.011</b> |  |  |  |
|         |     | Sig. (2-tailed)         | 0.936        |  |  |  |
|         |     | N                       | 57           |  |  |  |

\*\* . Correlation is significant at the 0.01 level (2-tailed).

### C. Analysis of Covariance: Tests of Between-Subjects Effects

|                     |                         |    |             |        |                   |  |
|---------------------|-------------------------|----|-------------|--------|-------------------|--|
| Dependent Variable: | Visual Field Area (cm2) |    |             |        |                   |  |
| Source              | Type III Sum of Squares | df | Mean Square | F      | Sig.              |  |
| Corrected Model     | 61105.896 <sup>a</sup>  | 7  | 8729.414    | 17.846 | 0.000             |  |
| Intercept           | 26487.945               | 1  | 26487.945   | 54.152 | 0.000             |  |
| Gene                | 46682.434               | 3  | 15560.811   | 31.812 | <b>p&lt;0.001</b> |  |
| Age                 | 9090.285                | 1  | 9090.285    | 18.584 | <b>p&lt;0.001</b> |  |
| Gene * age          | 29128.015               | 3  | 9709.338    | 19.850 | <b>p&lt;0.001</b> |  |

|                 |            |     |         |  |  |  |
|-----------------|------------|-----|---------|--|--|--|
| Error           | 48914.320  | 100 | 489.143 |  |  |  |
| Total           | 151717.967 | 108 |         |  |  |  |
| Corrected Total | 110020.215 | 107 |         |  |  |  |

a. R Squared = .555 (Adjusted R Squared = .524)

#### D. Analysis of Covariance, FAM161A vs. MAK

|                     |                         |    |             |         |                   |  |
|---------------------|-------------------------|----|-------------|---------|-------------------|--|
| Dependent Variable: | Visual Field Area (cm2) |    |             |         |                   |  |
| Source              | Type III Sum of Squares | df | Mean Square | F       | Sig.              |  |
| Corrected Model     | 54104.895 <sup>a</sup>  | 3  | 18034.965   | 42.450  | 0.000             |  |
| Intercept           | 46564.430               | 1  | 46564.430   | 109.602 | 0.000             |  |
| Gene                | 43283.565               | 1  | 43283.565   | 101.879 | <b>p&lt;0.001</b> |  |
| Age                 | 21710.042               | 1  | 21710.042   | 51.100  | <b>p&lt;0.001</b> |  |
| Gene * age          | 26086.272               | 1  | 26086.272   | 61.401  | <b>p&lt;0.001</b> |  |
| Error               | 33988.090               | 80 | 424.851     |         |                   |  |
| Total               | 115112.313              | 84 |             |         |                   |  |
| Corrected Total     | 88092.985               | 83 |             |         |                   |  |

a. R Squared = .614 (Adjusted R Squared = .600)

**E. Analysis of Covariance, FAM161A vs. RPGR**

| Dependent Variable: | Visual Field Area (cm2) |    |             |        |                   |  |
|---------------------|-------------------------|----|-------------|--------|-------------------|--|
| Source              | Type III Sum of Squares | df | Mean Square | F      | Sig.              |  |
| Corrected Model     | 7332.330 <sup>a</sup>   | 3  | 2444.110    | 10.390 | 0.000             |  |
| Intercept           | 7983.718                | 1  | 7983.718    | 33.938 | 0.000             |  |
| Gene                | 6937.289                | 1  | 6937.289    | 29.490 | <b>p&lt;0.001</b> |  |
| Age                 | 4379.930                | 1  | 4379.930    | 18.619 | <b>p&lt;0.001</b> |  |
| Gene * age          | 5278.146                | 1  | 5278.146    | 22.437 | <b>p&lt;0.001</b> |  |
| Error               | 15290.850               | 65 | 235.244     |        |                   |  |
| Total               | 28478.345               | 69 |             |        |                   |  |

a. R Squared = .324 (Adjusted R Squared = .293)

**F. Analysis of Covariance, FAM161A vs. DHDDS**

| Dependent Variable: | Visual Field Area (cm2) |    |             |        |       |  |
|---------------------|-------------------------|----|-------------|--------|-------|--|
| Source              | Type III Sum of Squares | df | Mean Square | F      | Sig.  |  |
| Corrected Model     | 5992.598 <sup>a</sup>   | 3  | 1997.533    | 12.756 | 0.000 |  |
| Intercept           | 1617.701                | 1  | 1617.701    | 10.330 | 0.002 |  |

|                                                 |           |    |          |       |       |  |
|-------------------------------------------------|-----------|----|----------|-------|-------|--|
| Gene                                            | 1311.998  | 1  | 1311.998 | 8.378 | 0.005 |  |
| Age                                             | 223.810   | 1  | 223.810  | 1.429 | 0.236 |  |
| Gene * age                                      | 397.653   | 1  | 397.653  | 2.539 | 0.116 |  |
| Error                                           | 10178.794 | 65 | 156.597  |       |       |  |
| Total                                           | 24215.869 | 69 |          |       |       |  |
| Corrected Total                                 | 16171.392 | 68 |          |       |       |  |
| a. R Squared = .371 (Adjusted R Squared = .342) |           |    |          |       |       |  |

**Supplementary Table S5:** Sequence of primers used in this study

|       | Forward              | Reverse                     |
|-------|----------------------|-----------------------------|
| Ex 3a | TGAGCATGGTGGCACAAG   | GCTGACCTACAAGGCAGAGG        |
| Ex 3b | TGCATCTGTCTTTCTCCCC  | TCTTAGAATACCCTCTGACAAAATATC |
| Ex 4  | ATCCCATGTTAAATCTTTGC | GAAAACCAGTGGTCTGGAG         |
